# Supplementary material for: Effects of açai on oxidative stress, ER stress, and inflammation-related parameters in mice with high fat diet-fed induced NAFLD
Source: PubMed Central journal article supplement (PMC6542795; doi:10.1038/s41598-019-44563-y), 2019-05-30
Supplement: 41598_2019_44563_MOESM2_ESM.pdf [file 41598_2019_44563_MOESM2_ESM.pdf]

# CERTIFICATE OF ENGLISH EDITING

This document certifies that the paper listed below has been edited to ensure that the language is clear and free of errors. The logical presentation of ideas and the structure of the paper were also checked during the editing process. The edit was performed by professional editors at Editage, a division of Cactus Communications. The intent of the author's message was not altered in any way during the editing process. The quality of the edit has been guaranteed, with the assumption that our suggested changes have been accepted and have not been further altered without the knowledge of our editors.

## TITLE OF THE PAPER

Effects of açai on oxidative stress, ER stress, and inflammation-related parameters in the liver of high fat diet-fed NAFLD-model mice

## AUTHORS

MAYARA MEDEIROS DE FREITAS CARVALHO AND COLLABORATORS

## JOB CODE

AYCAR\_1\_2

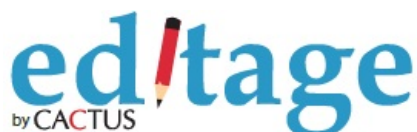

Signature

A handwritten signature in black ink that reads "Vikas Narang".

Vikas Narang,  
Vice President, Author Services, Editage

Date of Issue  
**October 13, 2018**

Editage, a brand of Cactus Communications, offers professional English language editing and publication support services to authors engaged in over 500 areas of research. Through its community of experienced editors, which includes doctors, engineers, published scientists, and researchers with peer review experience, Editage has successfully helped authors get published in internationally reputed journals. Authors who work with Editage are guaranteed excellent language quality and timely delivery.

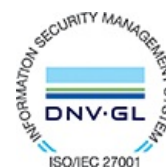

**CACTUS**

### Contact Editage

#### Worldwide

request@editage.com  
+1 877-334-8243  
www.editage.com

#### Japan

submissions@editage.com  
+81 03-6868-3348  
www.editage.jp

#### Korea

submit-  
korea@editage.com  
1544-9241  
www.editage.co.kr

#### China

fabiao@editage.cn  
400-005-6055  
www.editage.cn

#### Brazil

contato@editage.com  
0800-892-20-97  
www.editage.com.br

#### Taiwan

submitjobs@editage.com  
02 2657 0306  
www.editage.com.tw
